# Supplementary material
Source: Springer Nature journal article supplement (https://www.springermedizin.de/resource/supplementary/12888_2011_957_MOESM1_ESM.pdf/9478654)
Supplement: MOESM1 [file 9478654]

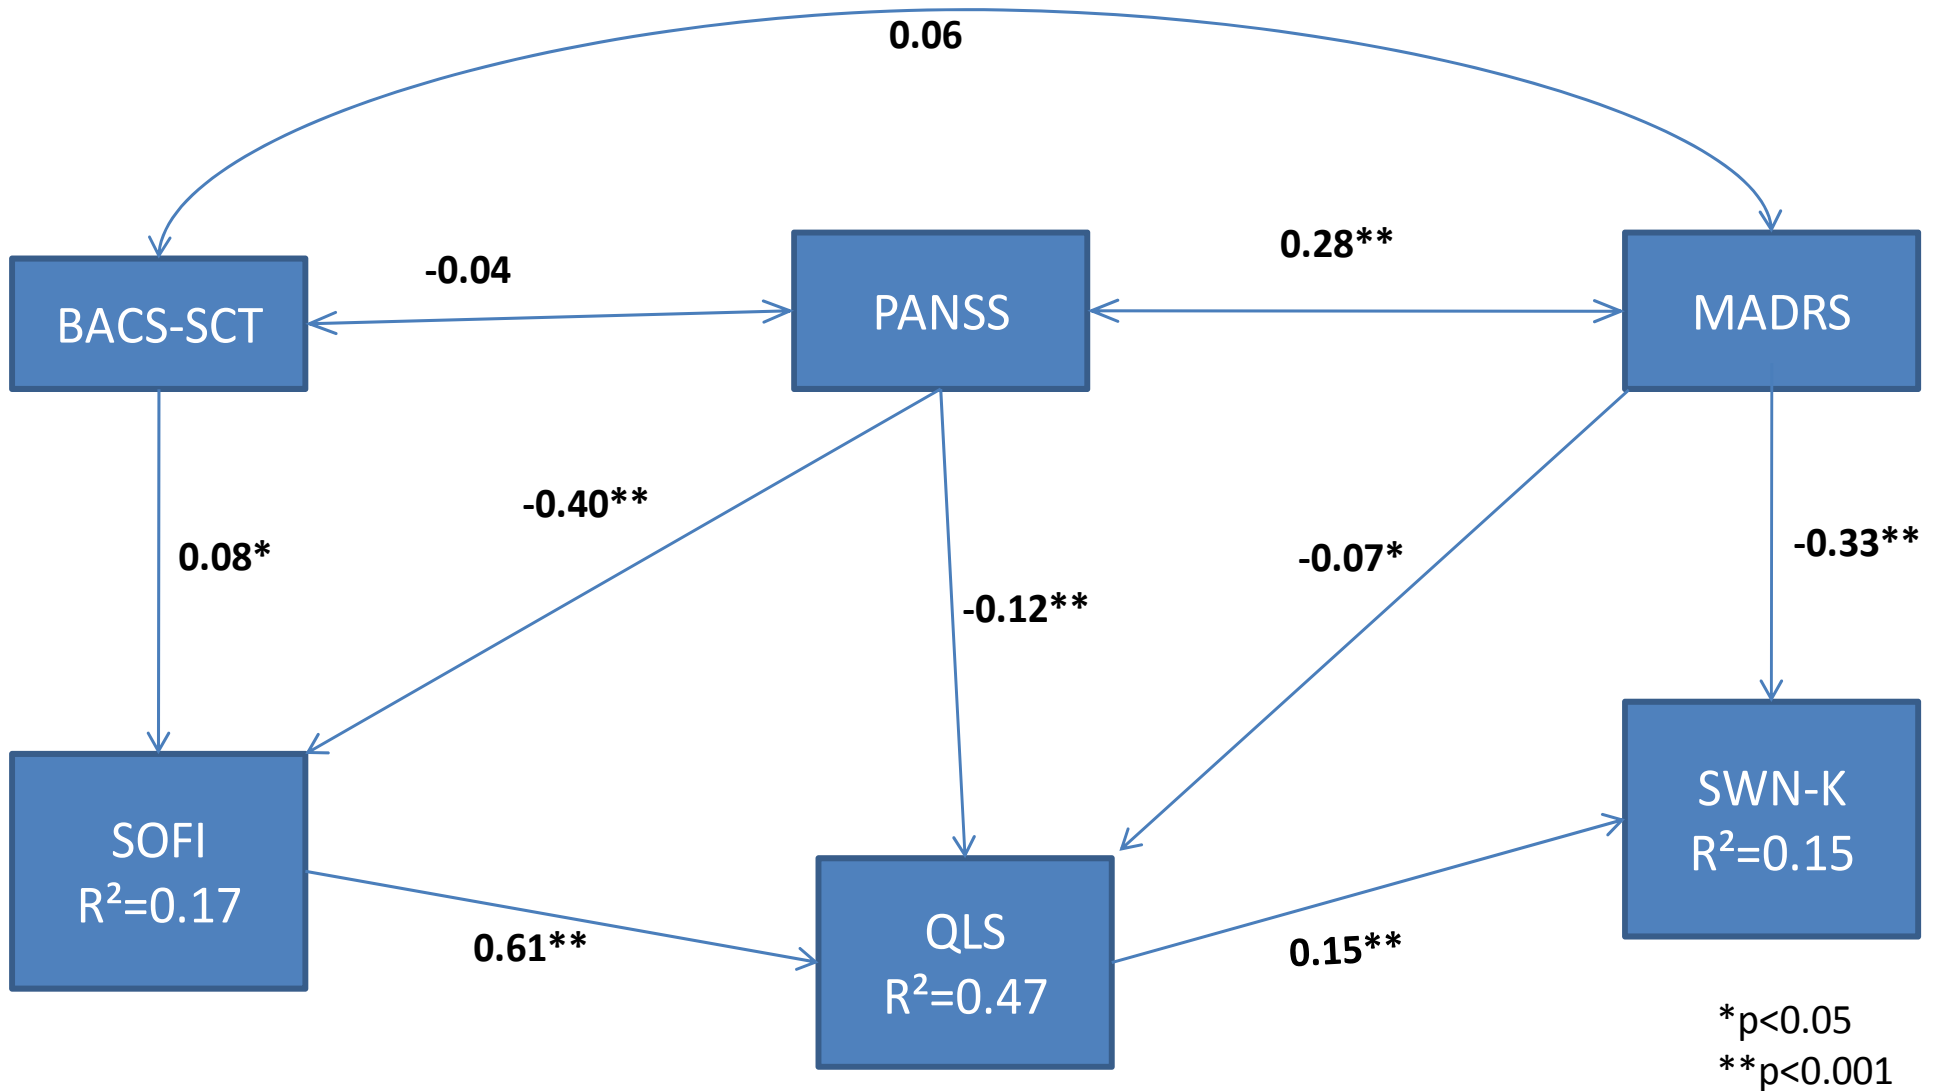

| Model Fit Statistics | Chisquare |     |       | RMSEA | CFI   | TLI   |
|----------------------|-----------|-----|-------|-------|-------|-------|
|                      | $\chi^2$  | df  | p     |       |       |       |
|                      | 0.458     | (5) | 0.994 | 0.000 | 1.000 | 1.019 |

Note: RMSEA = Root Mean Square Error of Approximation ; CFI = Comparative Fix Index; TLI = Tucker-Lewis Index
